# Supplementary material for: TranSynergy: Mechanism-driven interpretable deep neural network for the synergistic prediction and pathway deconvolution of drug combinations
Source: PubMed Central journal article supplement (PMC7906476; doi:10.1371/journal.pcbi.1008653), 2021-02-12

# Graph Convolutional Neural Network

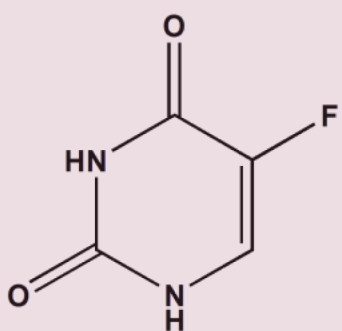

5-Fluorouracil

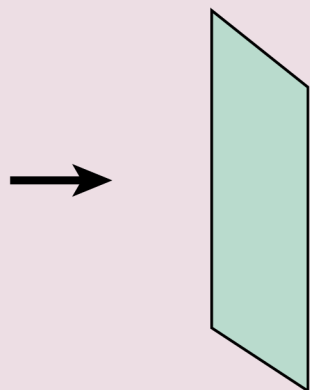

## Dimension reduction

## Transformer

## Fully Connected

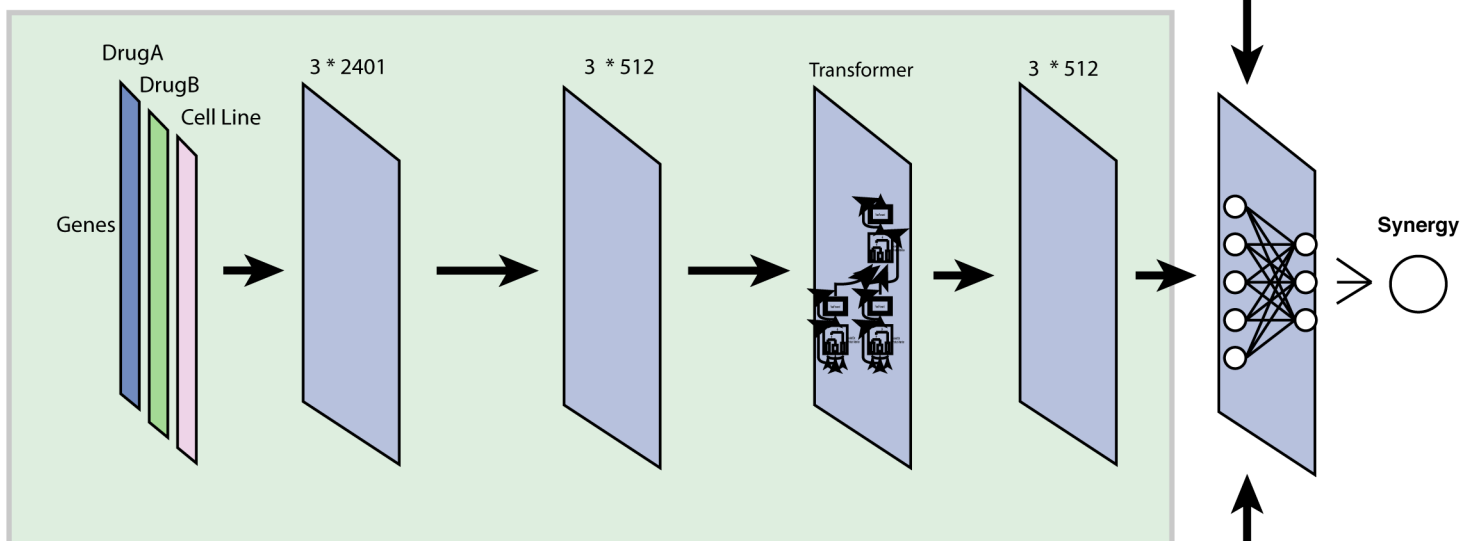

# Graph Convolutional Neural Network

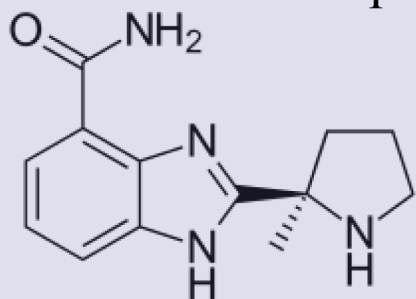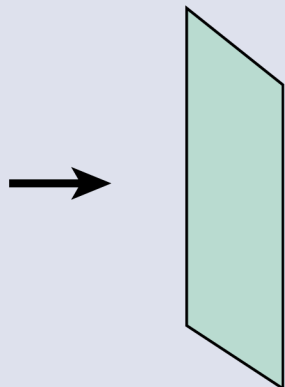

Supplement: pcbi.1008653.s008.pdf [file pcbi.1008653.s008.pdf]
