# Supplementary material for: TranSynergy: Mechanism-driven interpretable deep neural network for the synergistic prediction and pathway deconvolution of drug combinations
Source: PubMed Central journal article supplement (PMC7906476; doi:10.1371/journal.pcbi.1008653), 2021-02-12

Drug targets SHAP values

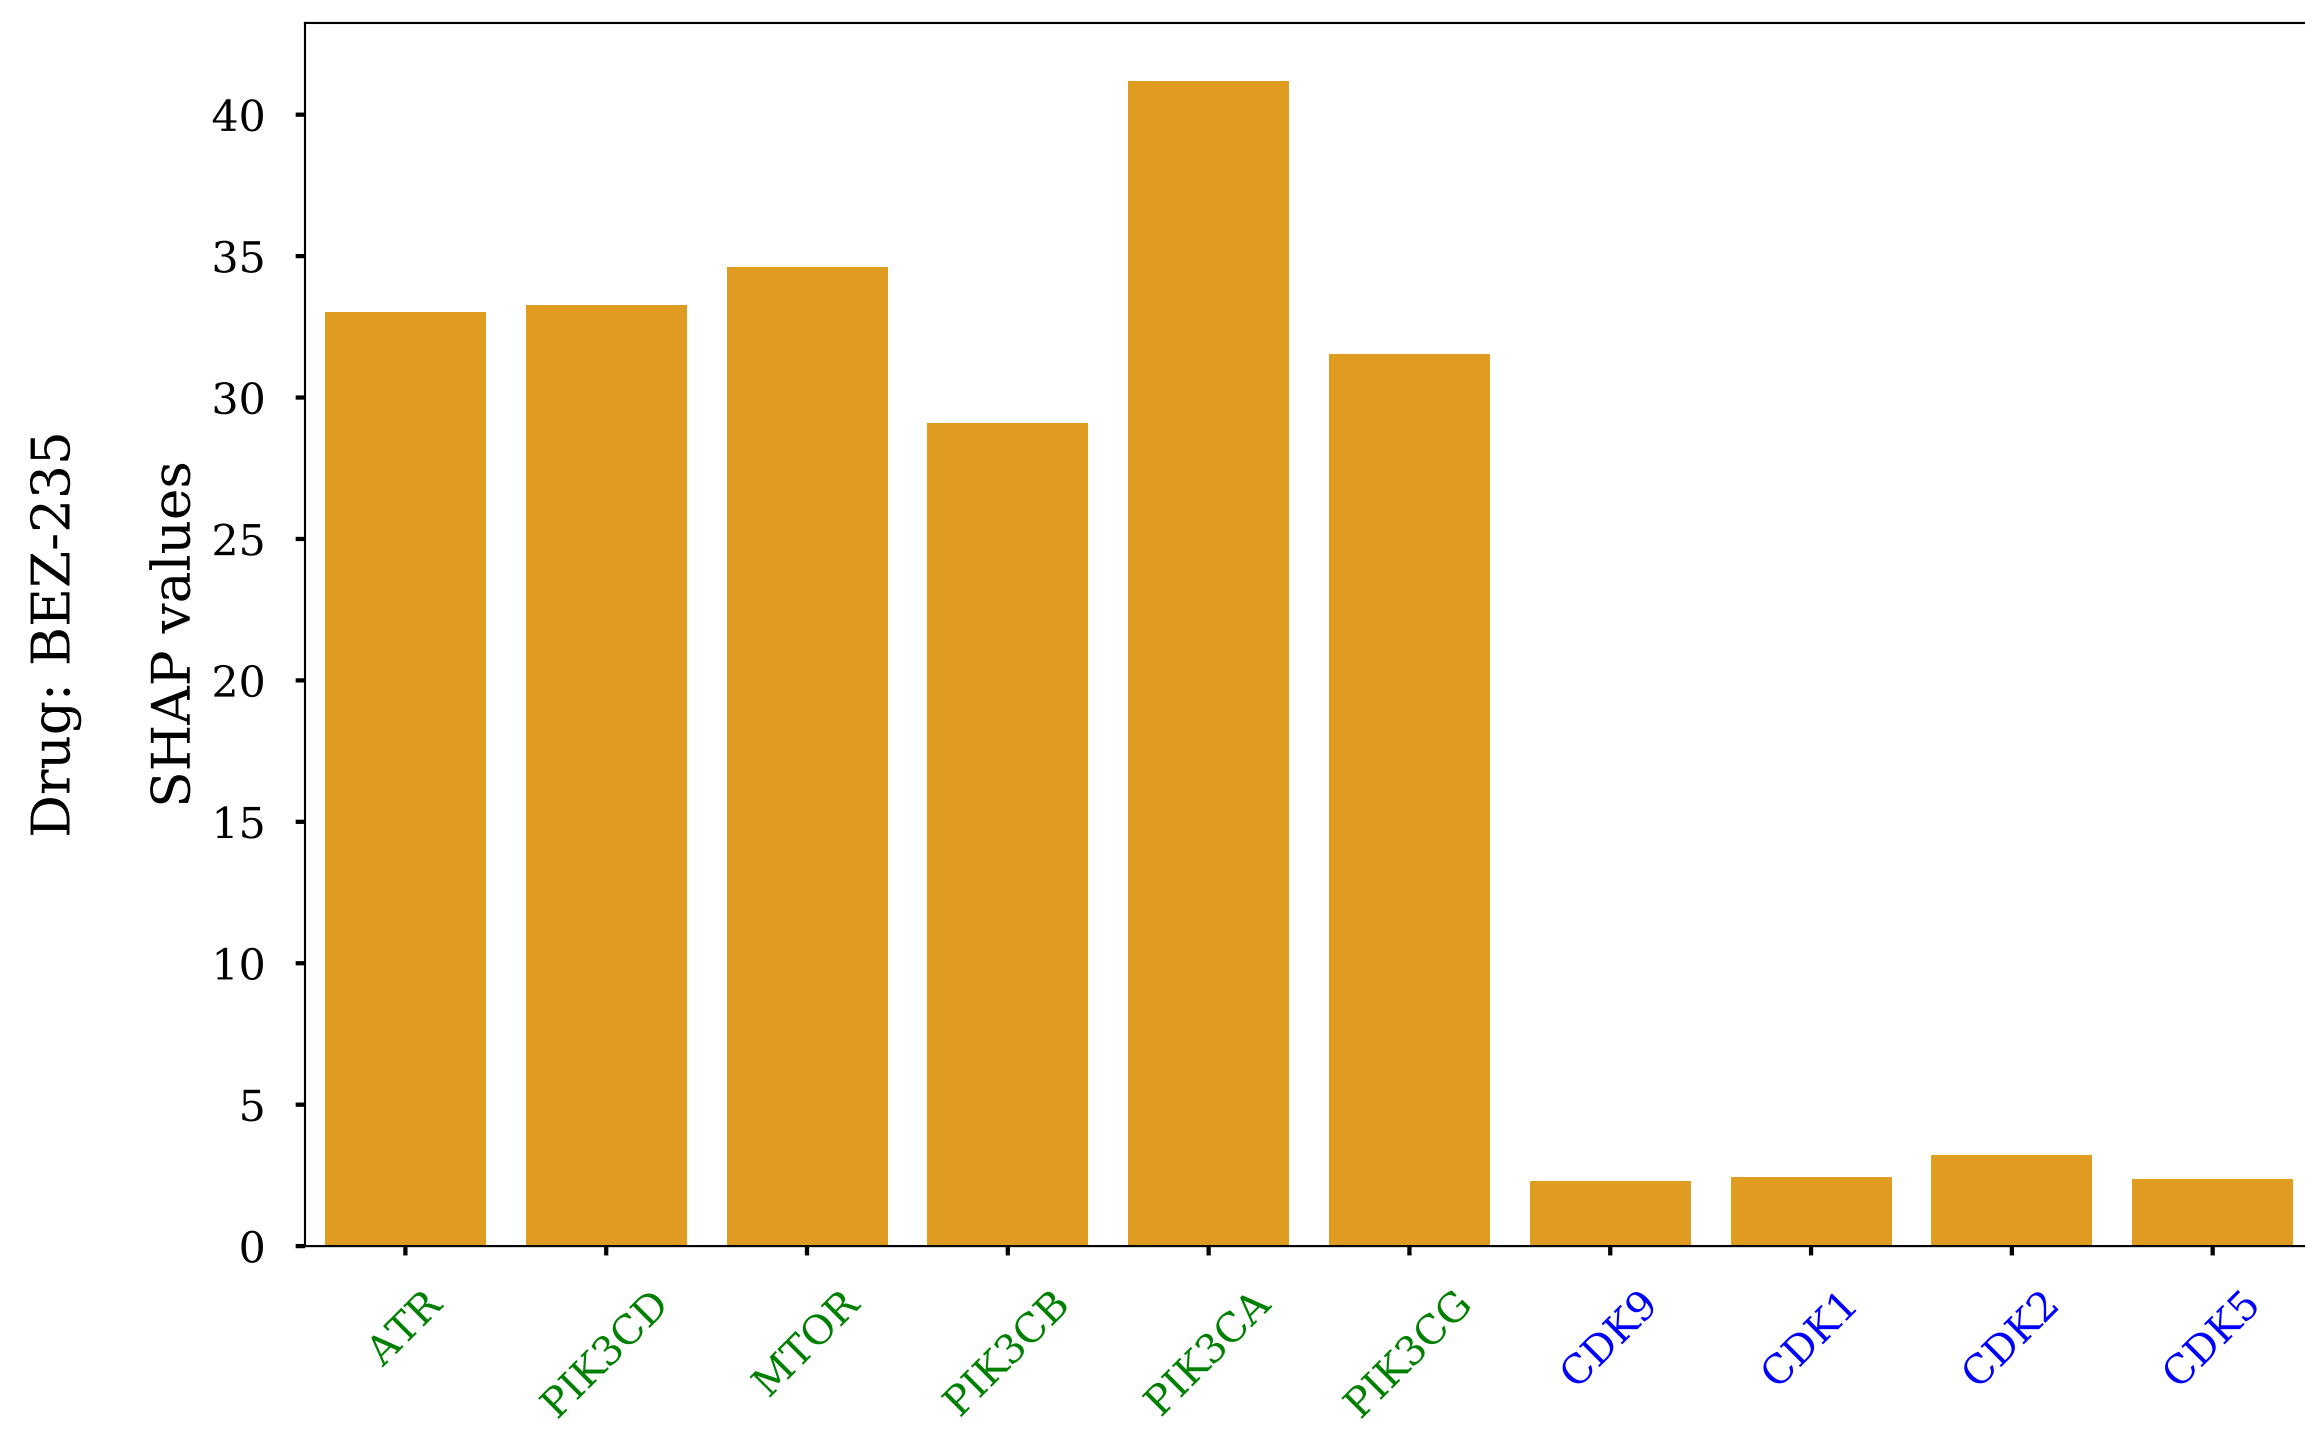

Top 20 genes with highest SHAP values

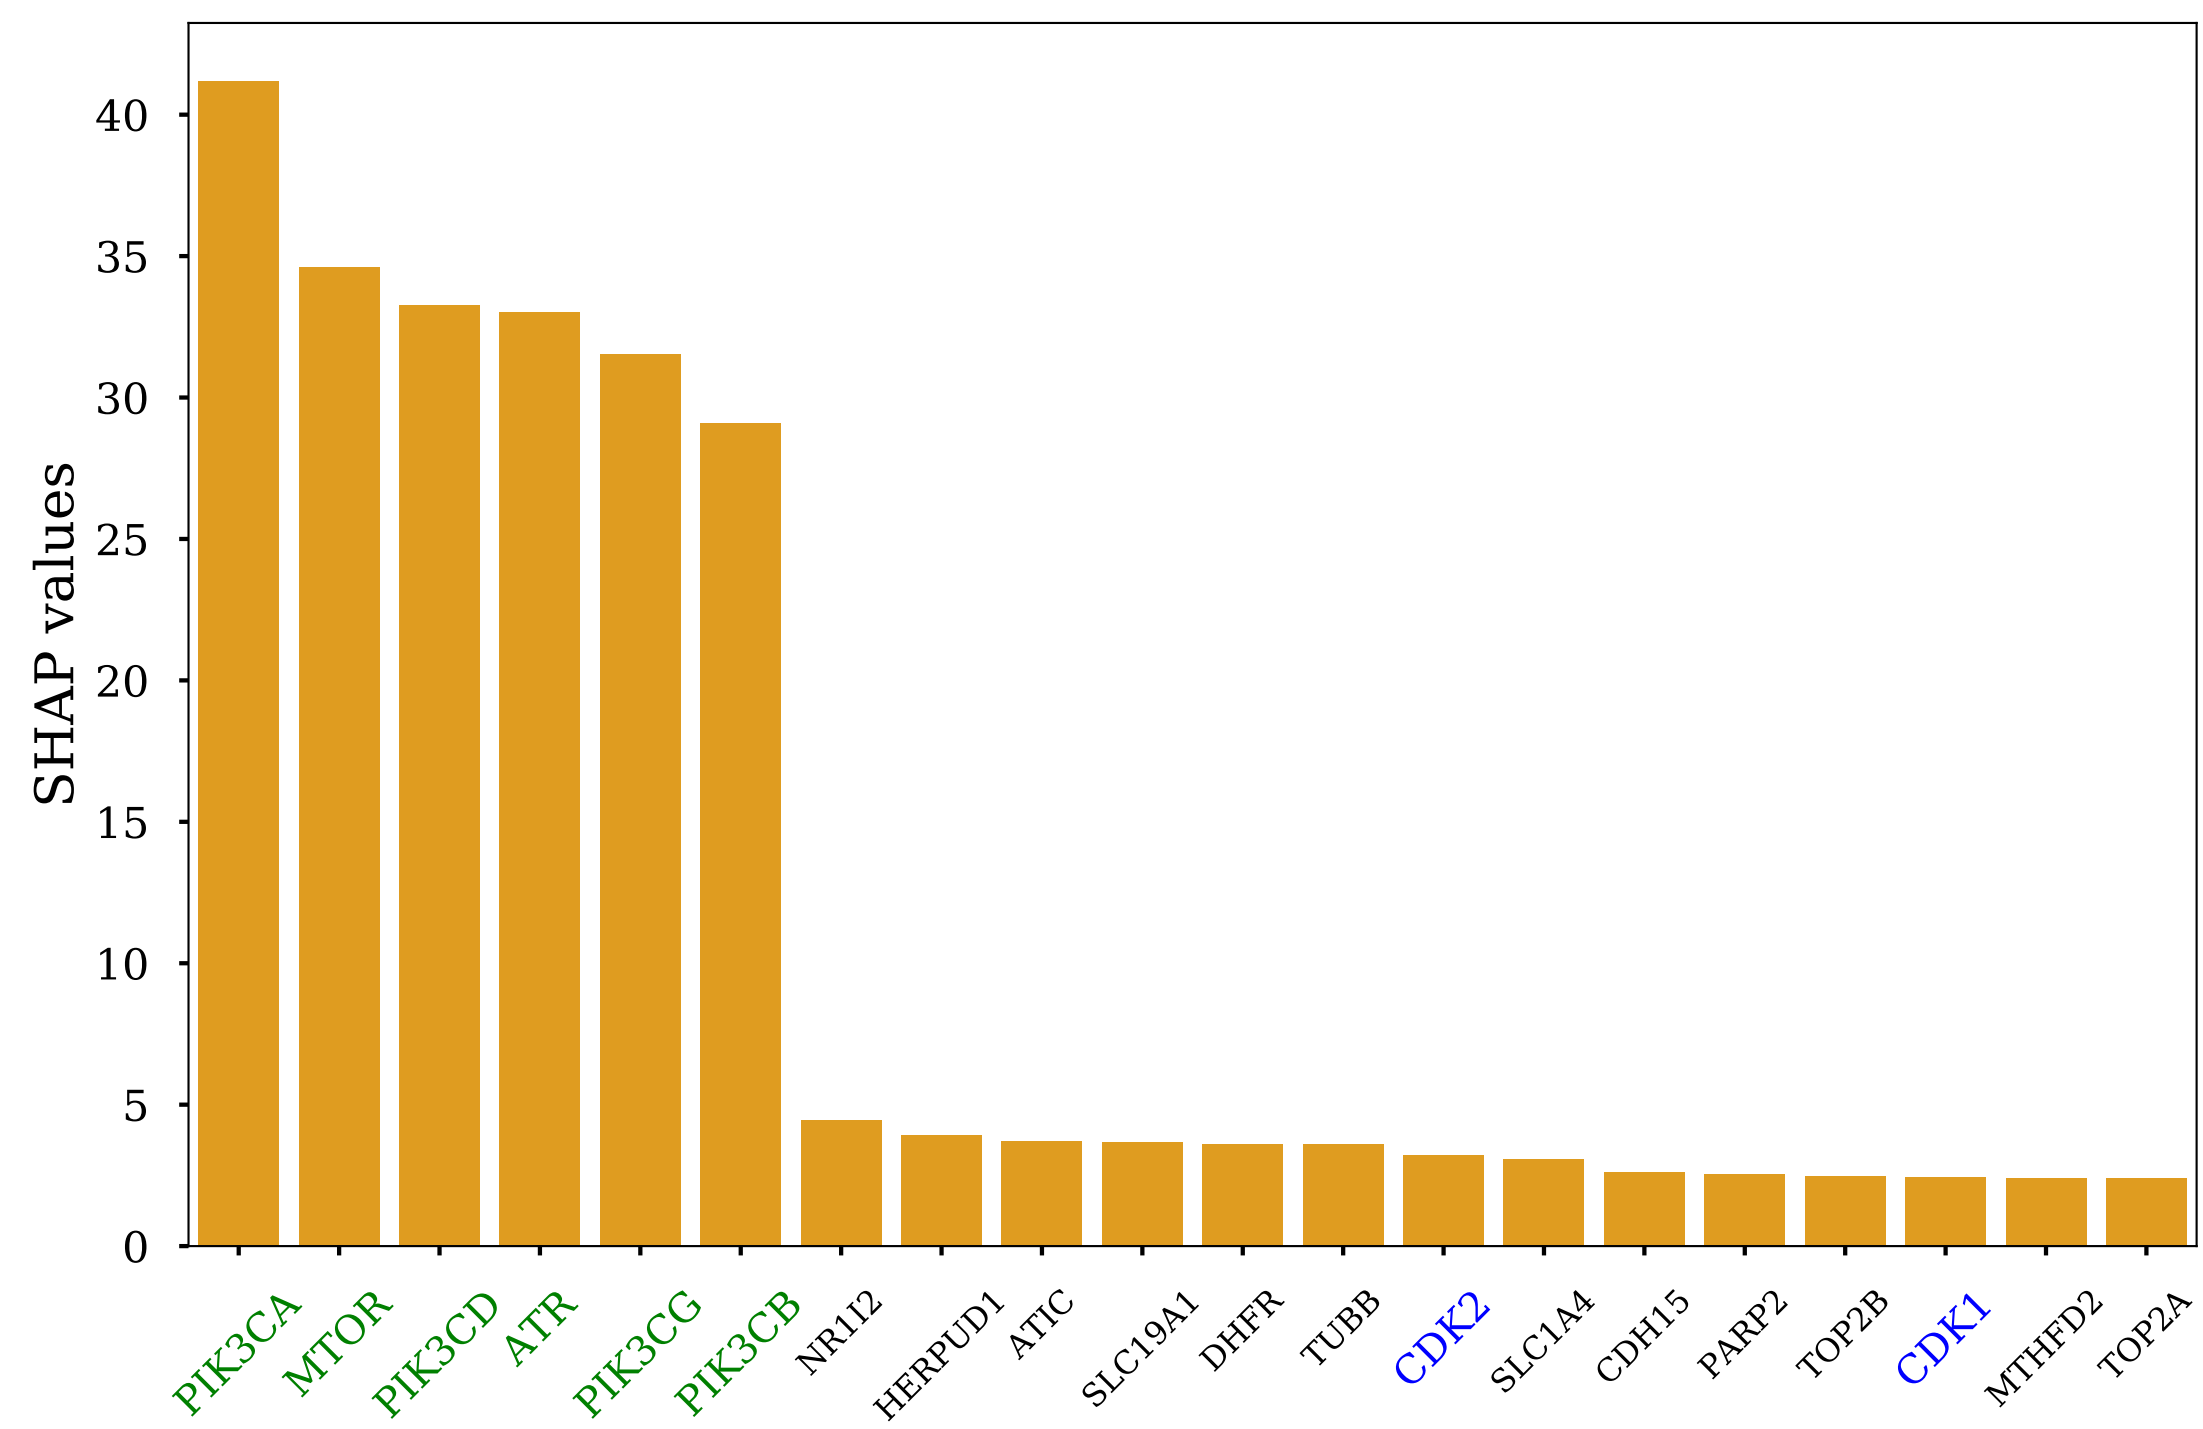

Drug: DINACICLIB

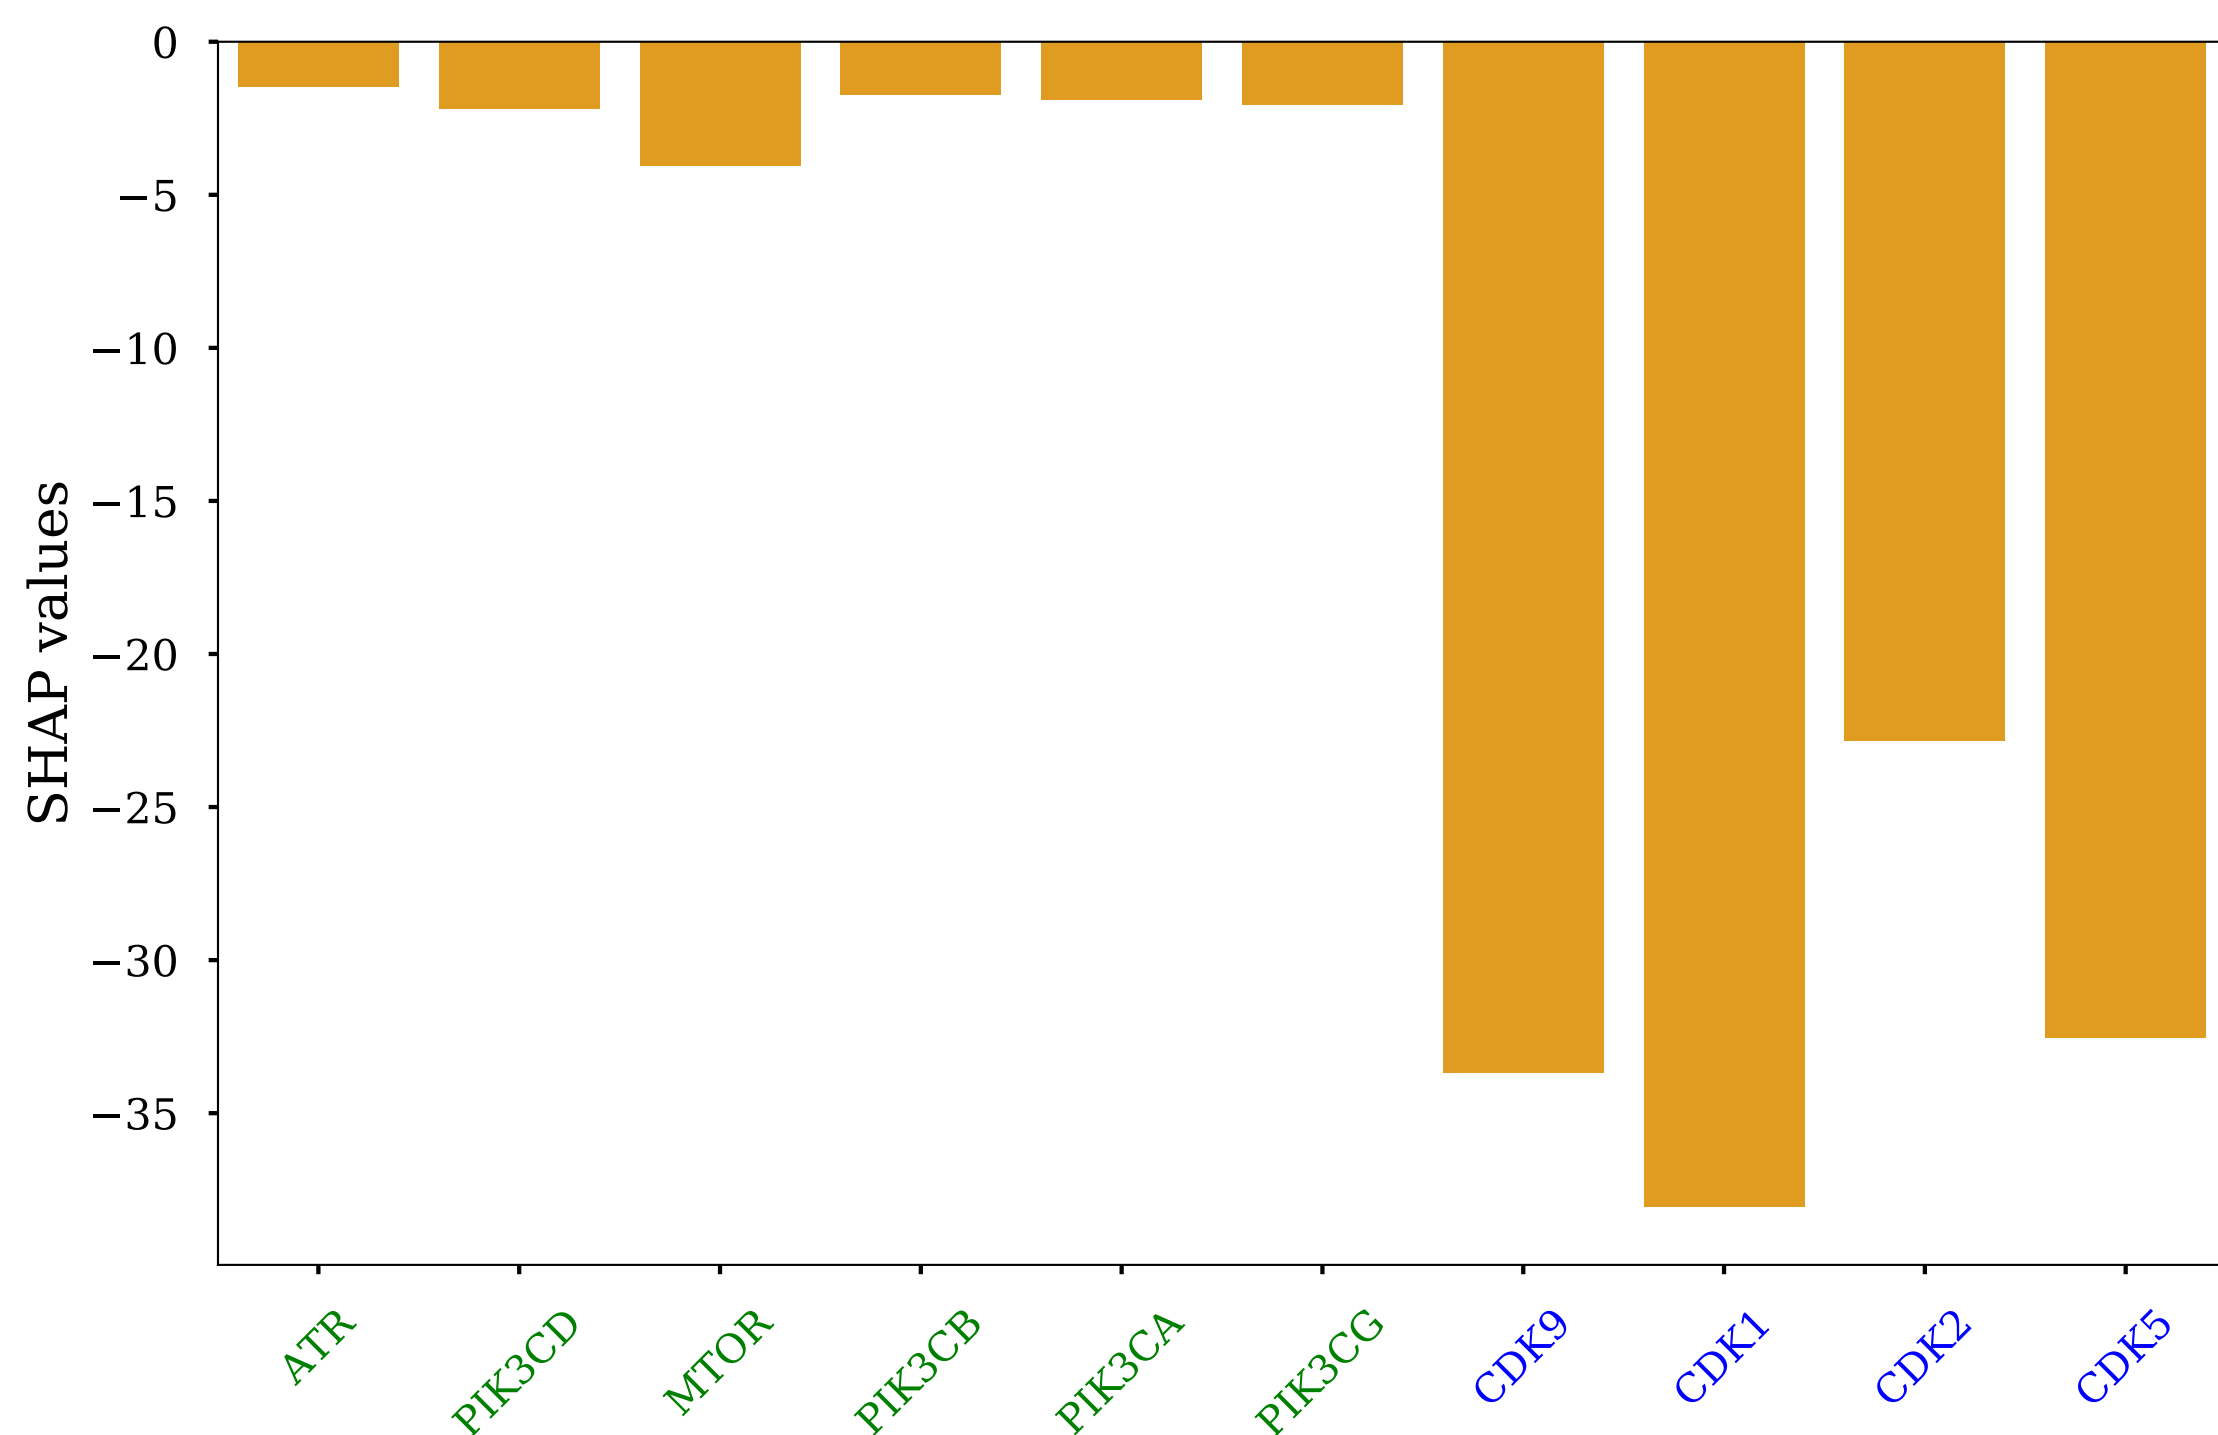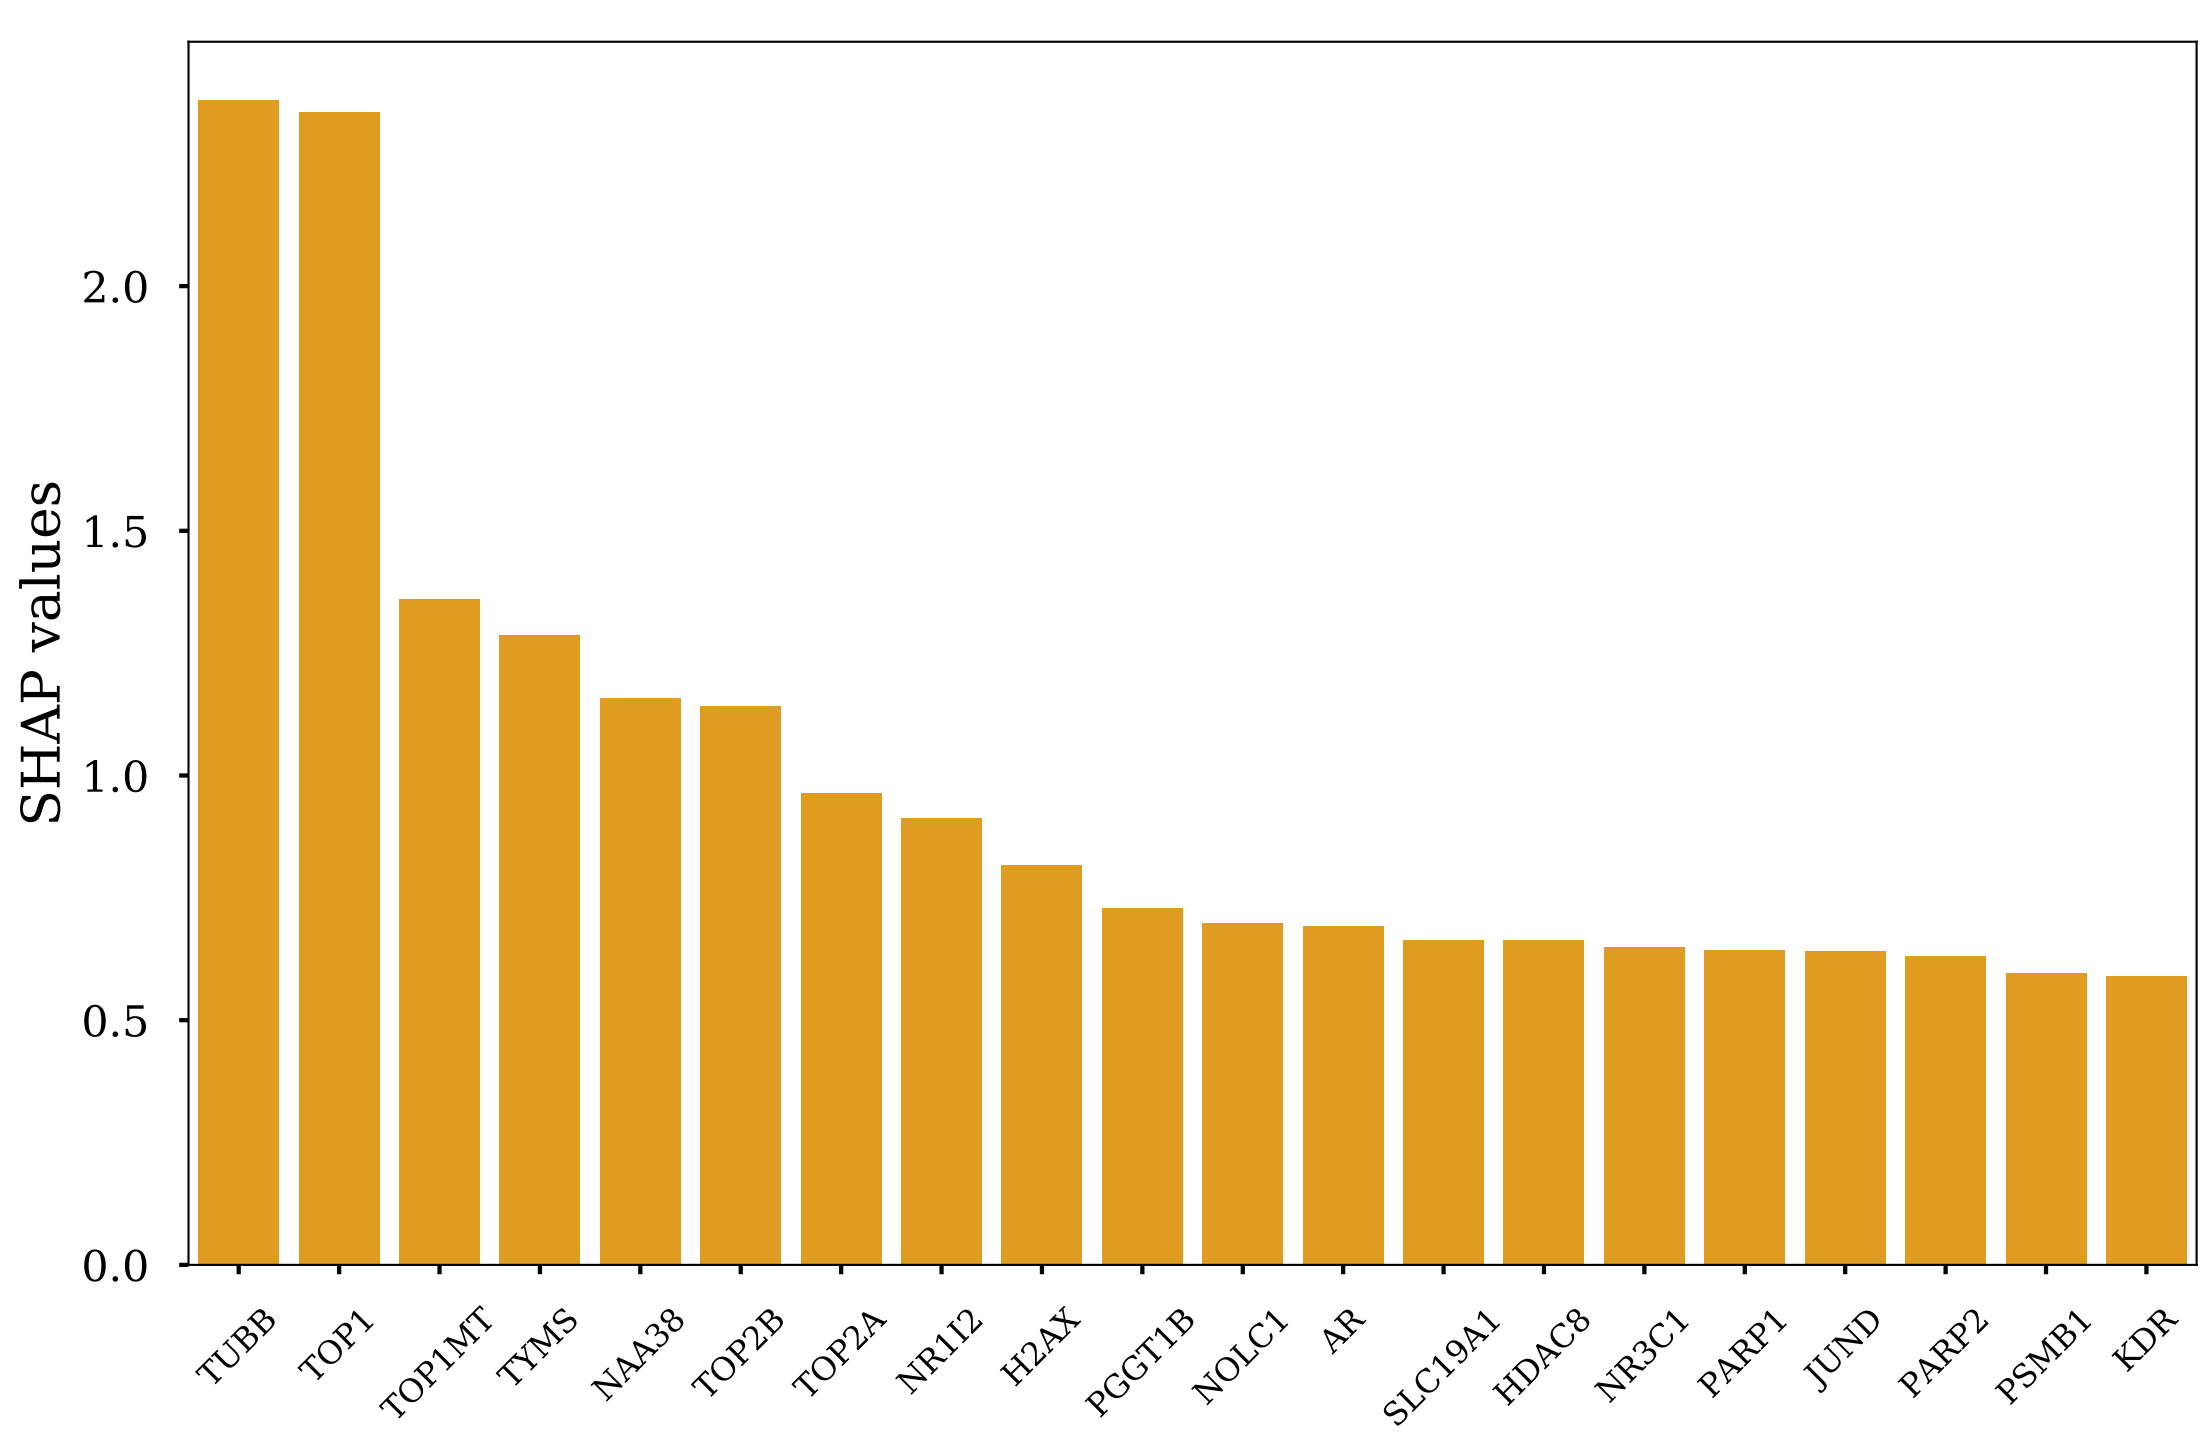

Cell Line: T47D

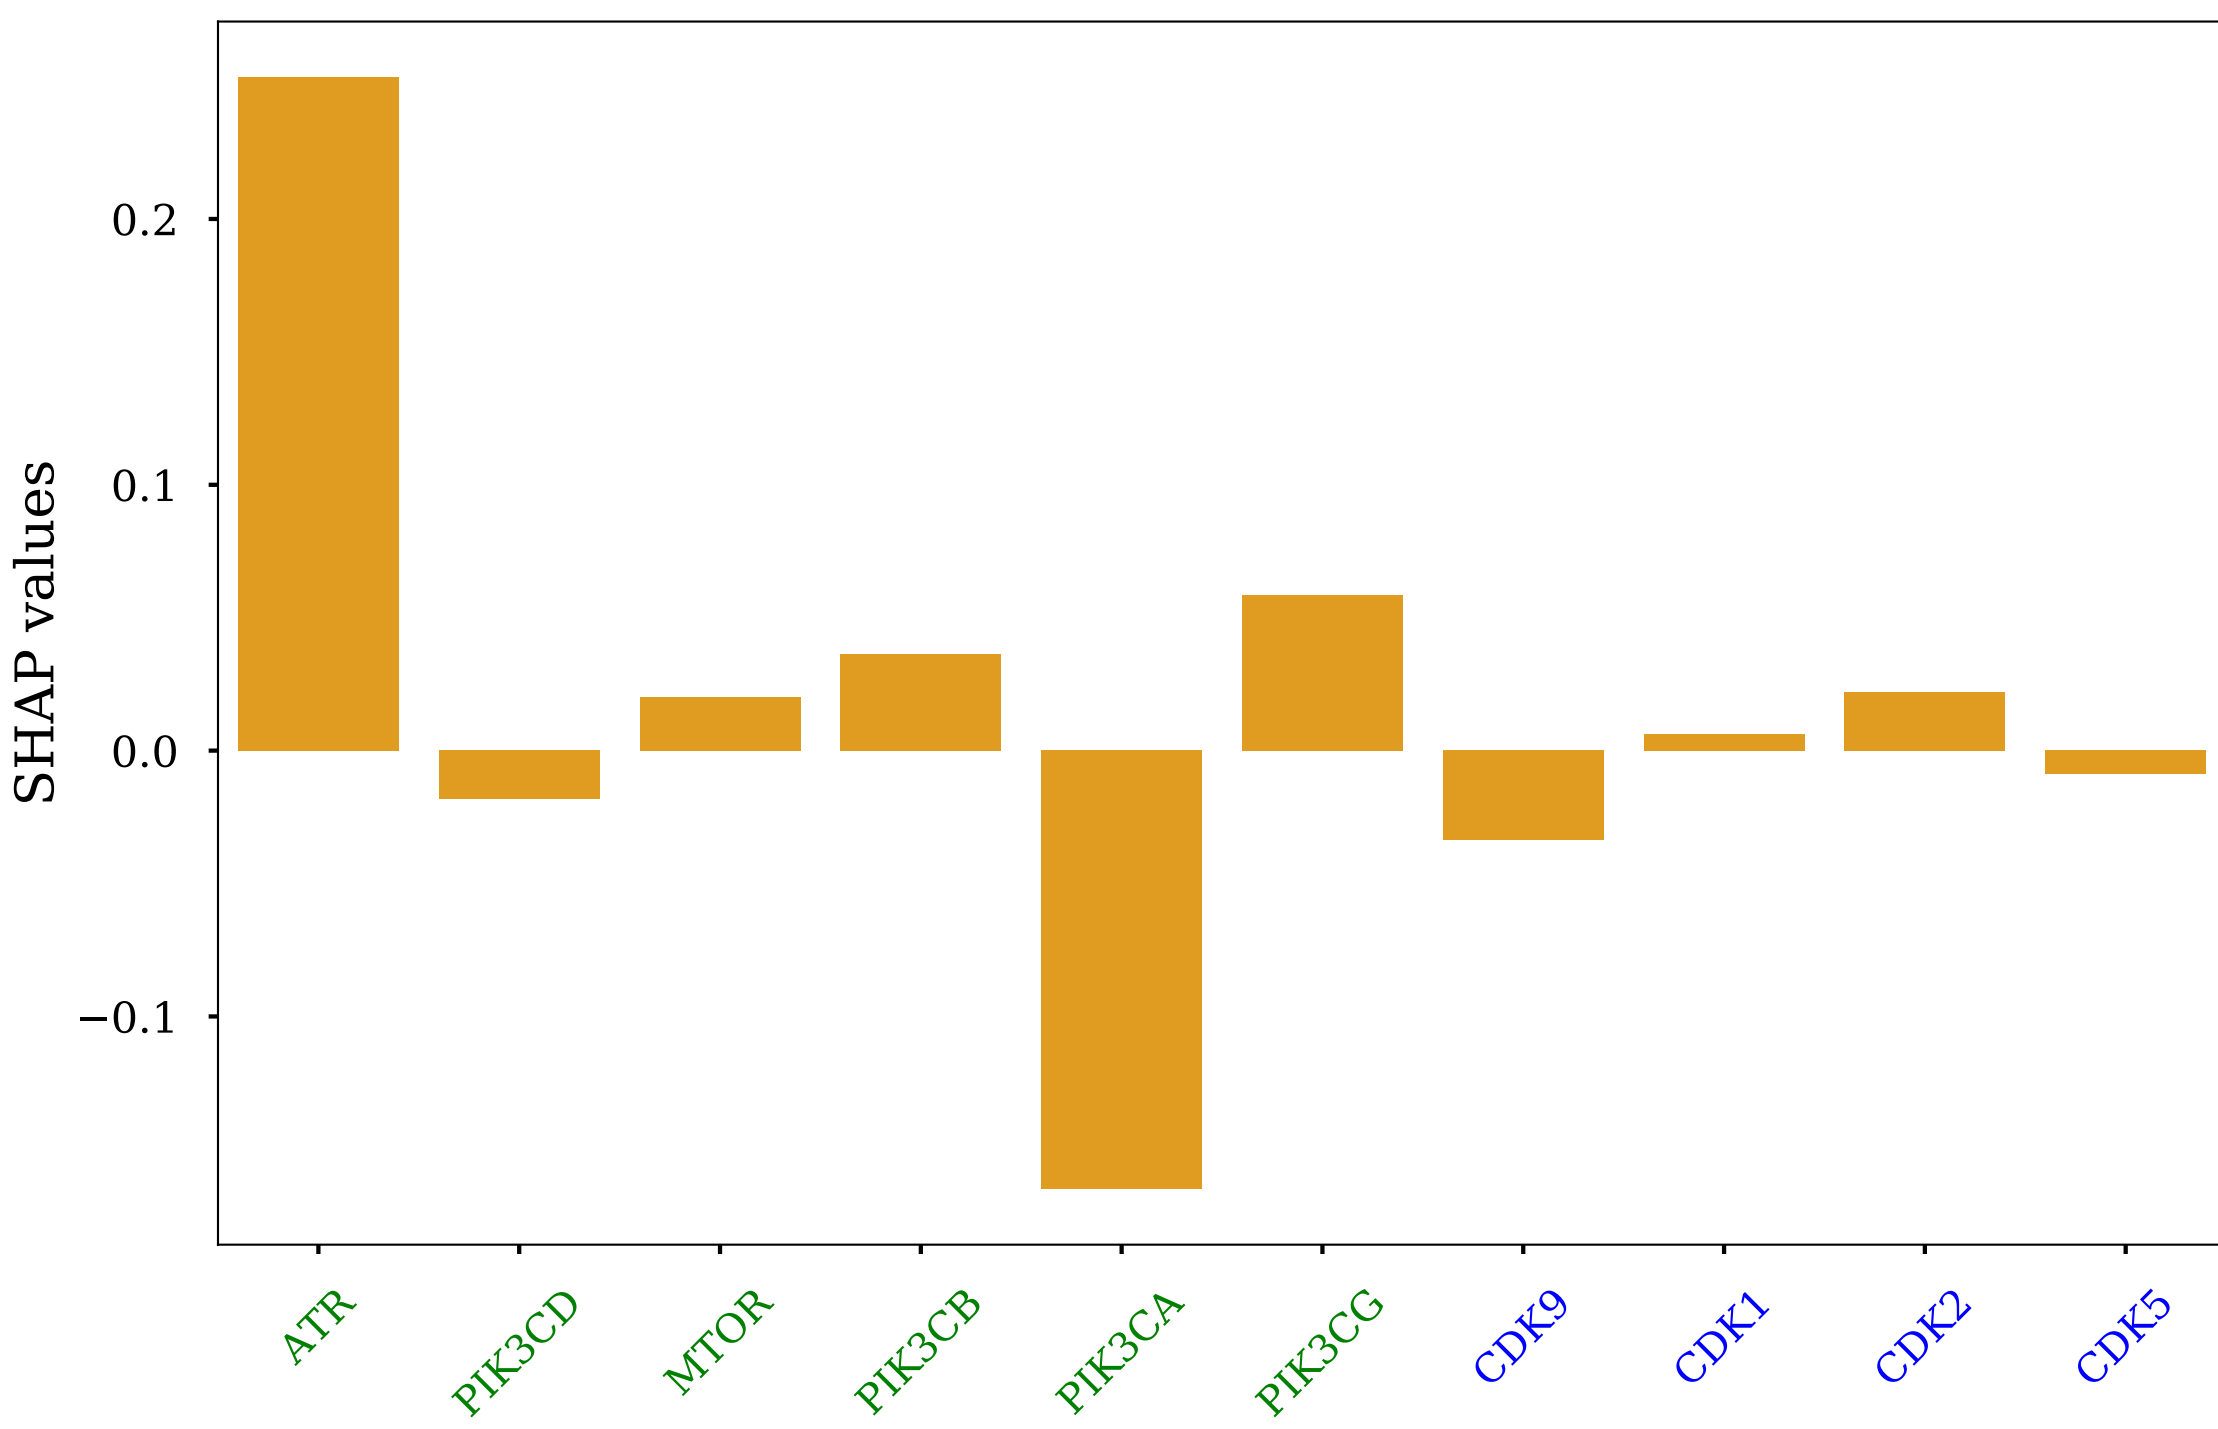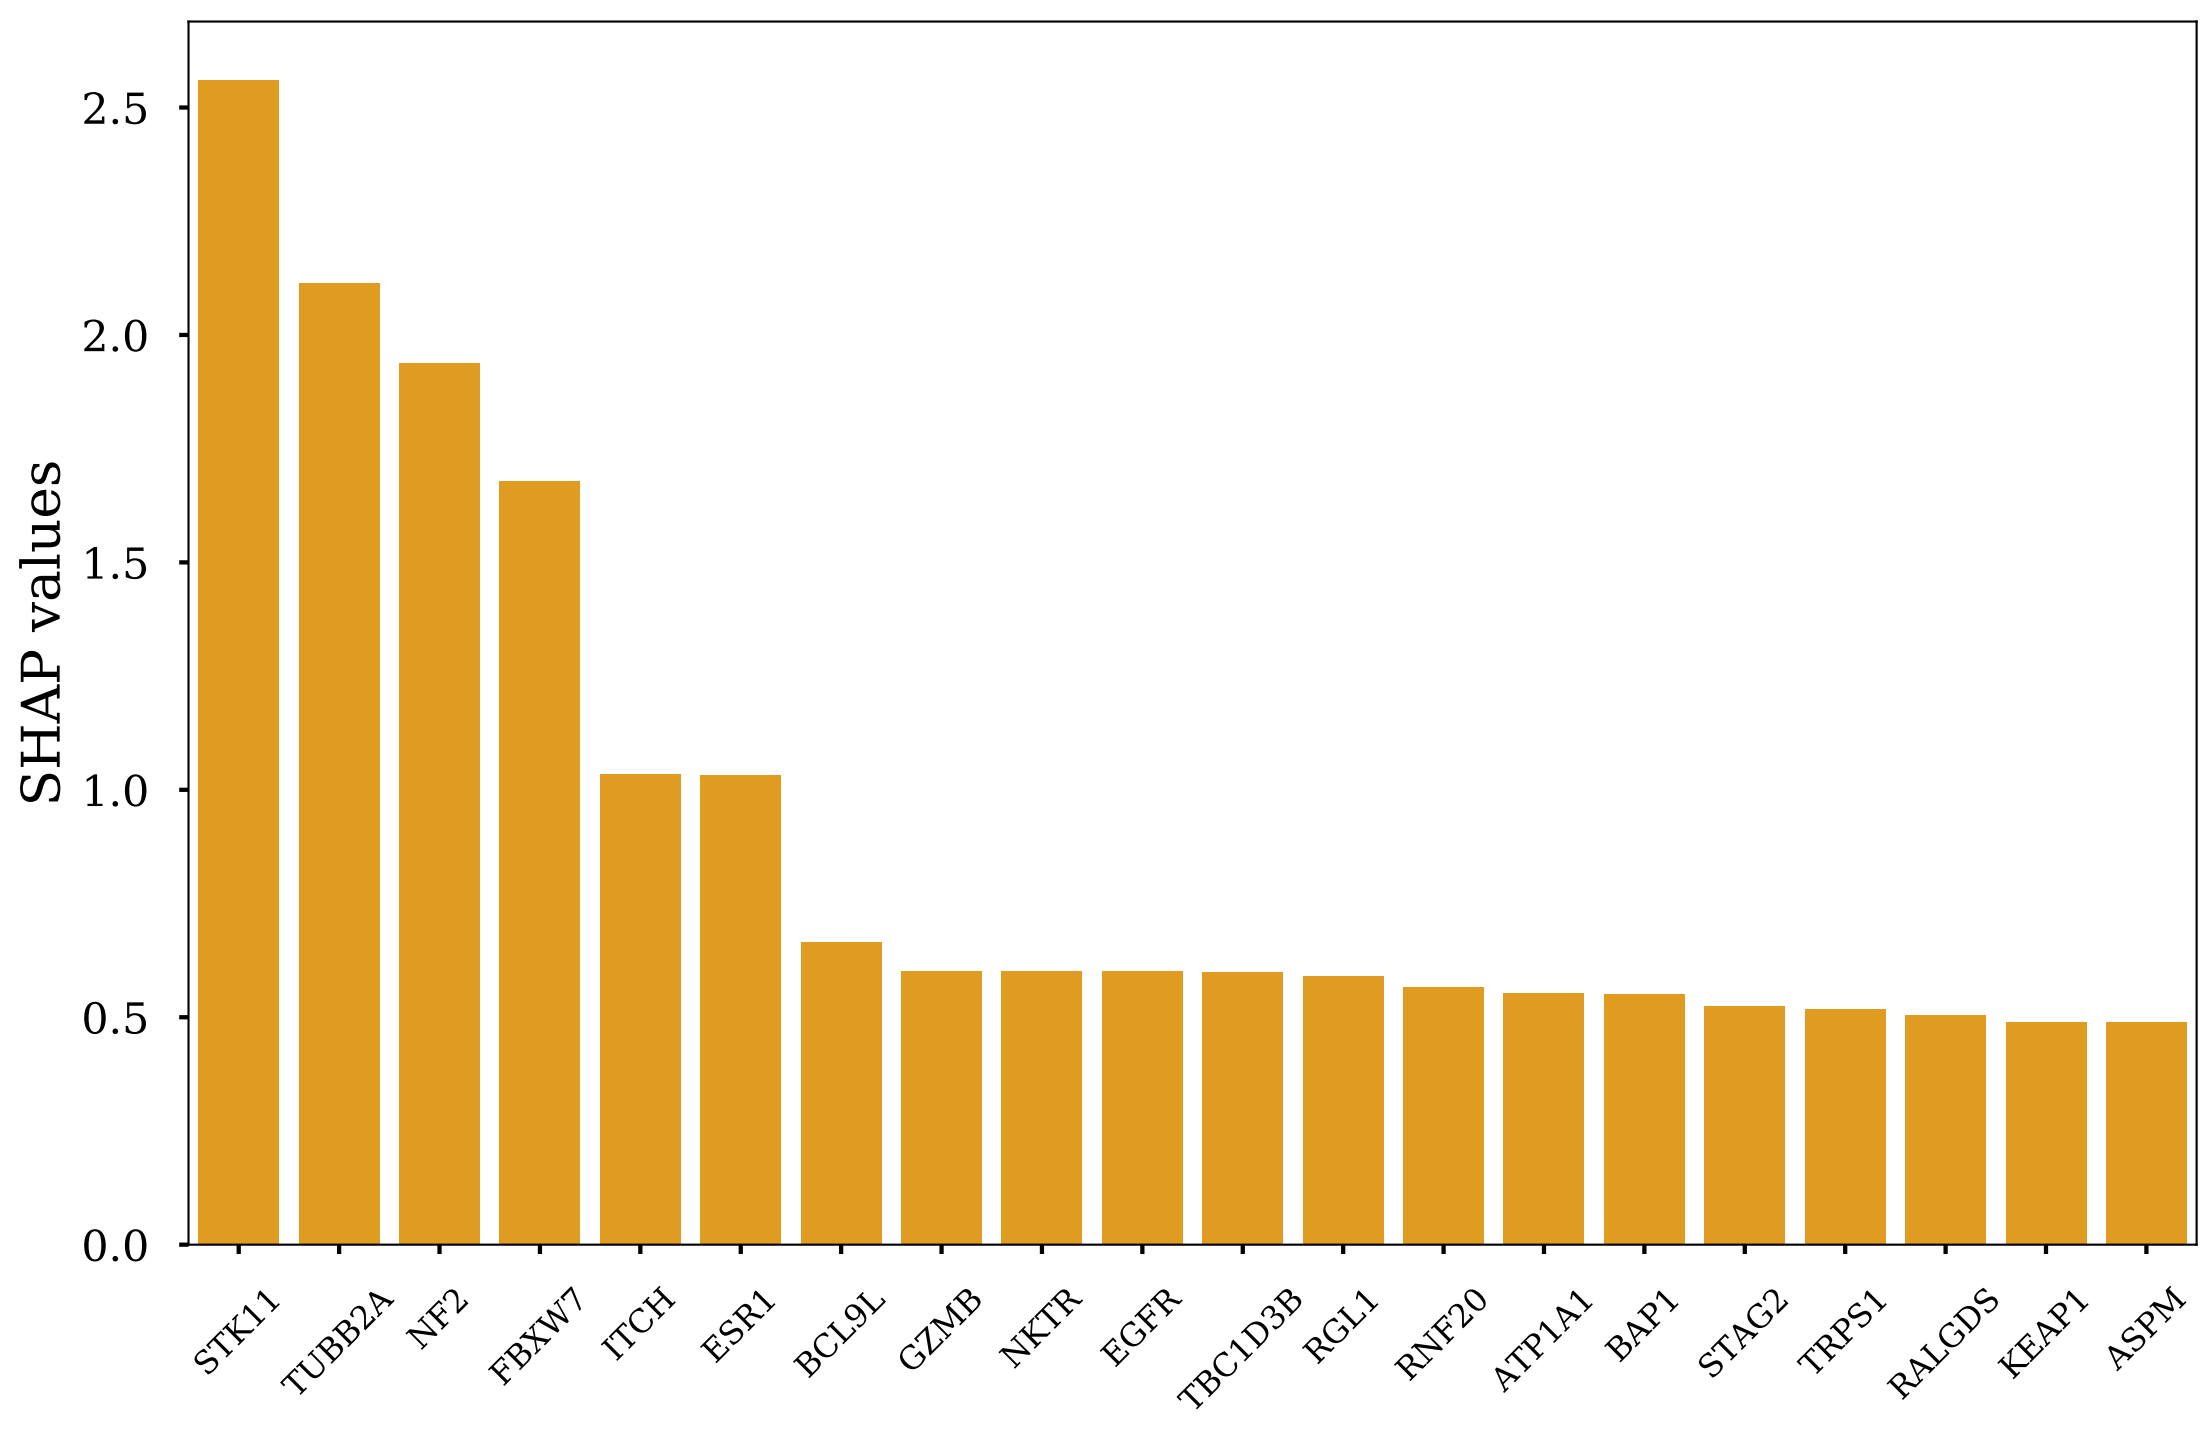

Supplement: pcbi.1008653.s014.pdf [file pcbi.1008653.s014.pdf]
